>SlJAZ1\_Solyc07g042170.2

ATGGCTTCAT CGGAGATTGT GGATTCCGGG AGATTTGCCG GTCAGAAATC GCATTTCTCT  
CATACATGTA ACTTGTGAG TCAATACTTG AAAGAGAAGA AAGGTTCTTT GGGAGATCTC  
AGCCTTGATA TGCATCGCAA TTTTCGATTCA GCTGGTTCTA CTAATATGGA TTTGTGCGG  
ATGATTGAGA AATCTGGTGA GTTGGTTCAG AAATCGATGA ATCTGTTCCC TCAAGGTGGA  
ATGAAGGCTG AGTCGGAACC GGAAAAGGCA CAGATGACGA TATTCTATGG AGGTCAAGTT  
ATTGTGTTTA ATGATTTTCC GGCTGATAAA GCTAAGGAAA TCATGCTTAT GGCTAGTACT  
AGCAAGGGAA ACAATCCTGC TAAACCATTG GAATCTGCTG CCGATTTGGT GGTTCCGAGT  
TTCGGAAAAA CTTCATCCA GGAAAATCAA ATGCCTAACC AGCCAATTGT TTCTGATTTA  
CCTATTGCGA GAAGAGCTTC ATTAACAAGG TTTTGGGAGA AGAGAAAAGA TAGGCTAACT  
GCAAAAGTAC CTTACCATAG AGAGGAAGCA GCAGCTCCTA AAAAGGAAGA ACACAAGGCG  
CCATGGCTGG GATTGGGTGG TCAATTTGCA GTGAAAAGT G

>SlJAZ2\_Solyc12g009220.1

CAGACTTGTA ACCTTTGAG TCAATTCTTG AAGAAAAAAG GTTCTGTTGG AGATCTTAAT  
AATCTTGGTA TCTACAAAAC TACTTTTGAA TCAACTGGAT CTCAACAAAC AGCTACTACC  
ACCACAATA CTATGAATT GTTACCAATG ATTGAGAAAT CAAGTGATT ATCGTCGTCA  
TCGTCGTCG TTGAAAACAA TCCTCAAAAA CCCATGAATC TTTTCCCTCA AGAATTTGAT  
TTCTCCAAAG AACCAATCCAC AAAAAAGACA GAATCTTGG AACTGATCA ACCAGAGAAG  
GCACAAATGA CCATTTTTTA TGGTGGACAA GTCATTGTTT TTGATGATTT TCCAGCTGAT  
AAAGCAAATG AAATCATGAA GTTAGCCAAC AAACAGAACC CCACAAACAA TTTCACTTAT  
CCTATGATCA AGAATCAAAA AACAGCTGAT CAATCTGGTG TGAGTTTTGG TAACAAATG  
ATTCAAGAAC TTCCTAACT GTCAATGCCA CAGCCTTCTG TTGCTGATTT ACCAATCGCG  
AGACGGAATT CACTTACAAG ATTCTTGGAG AAAAGGAAAG ATAGAGTAAC ATCAATTGCA  
CCATACCAA TCTCAACAA CAAGAAATCC AAGAATGAGG ATAACAAAGC ATGGTTGGGA  
TTAGGTGCTC AATTTGTTAA AACTGAGCAA TATTTCTAG

>SlJAZ3\_Solyc03g122190.2

ATGTCGAATT TATGTGACGC TCGCCGGAGG AATGGAAACG GCAAGGCGCC GGAGAGATCA  
AGTTTCGTAC AGACTTGTA CTGTGTTGAGT CAGTTTATTA AAGGGAAAGC TACTATTAGA  
GATCTGAATC TCGGAATCGC CGGTCAGCCG GAAGCTGCAG GGAAAACCTGA AACTGCAACT  
ATGGATTTAT TAACAGTCAT GGAAAAACCA TCTATTGATC TAACAAAAGA AGAACACAAA  
TCCGTAGATC TTGTTACAAC AGAGTCTTCT AGAGAGAAGG AGGCCGCTGT AAATGAGCCC  
AGCACAAGCA AAGAGGCACC AAAGGAGCCT AAGGCAGCCC AATTGACTAT GTTCTATGAT  
GGTAAAGTGA TTGTTTTTGA TGATTTCCCT GCTGACAAAG CTAGAGCAGT GATGTTATTG  
GCTAGTAAAG GATGTCCTCA GAGTTCATTT GGGACTTTCC AGGCTATAAA CATCGACAAA  
ATTAACACAT GTTCTCCTGC CCCTGCTTCT TTGACAAGTA ATAGAACTGA TTCTGTTGCA  
CCACAGCAAC AACACCTCCA GATTAAGCCA GACTCTTGCT CTGCTGCACC GCAACAGCAC  
AAGCACAATT CGCCCCACT CCATGTTTGT AGTAGTACTA AAATGATCA GCTTAAGCTC  
GGATCAGTTT CATCTGCACC CTTAGTAGAG CAGGAGCAAC ACAAGCAAAT CCAGTCACAG  
GCTGCCGAAA TTAGCAGCAG CTCCGAGCTA CCTATCGCAA GAAGATCTTC ACTTCATAGG  
TTTCTCGAGA AGAGGAAAGA TAGGGCAACT GTTAGAGCTC CATACCAAGT TGTACGTAAC  
AATCCGTTGT TACCATCTTC TTCGAATACT AATGGTGAAT CATCTTCTAA GGATAGCGAA  
GATCAGCTCG ATCTCAATTT CAAGTTATAG

>SlJAZ4\_Solyc12g049400.1

ATGTCAAATA GGCAACTTTG TTCATTAGAT AGTGAGAAAT CACATTTGAT GAATACTTGT  
AATTTGTTGA CTCAATTTT CAATGGAAAA GCAAATATCA ATGATCTAAA TCTTACAATT  
AGTAACAATG GAGAAGCCAA AGCCTCAGCA ACAAAGGATT TGTTAACCBA CATGGAAGAA  
TTATCAACTA AGACAACAGA ACAAGACCAG AAATTAATAG ATCATGTTCC TAAAAGTGCA  
ATAAATAAAG CCAGCGGCAG CAAAGAGATA CCACATAAGG AGCAAAAGCT AGCCCAATTA  
TCTATATCT ATGGGGGTAA AGTGGTGGTT TTTGATGATT TTCCAGCAGA GAAAGCCAGA  
GCAGTGATG TATTAGCTAG CAAAGGAATC TCTAACAAC CTTGTGCCAT TTTTCAAACC  
CCCACACCA CTCAGACTAA TGGATCCAAC AACTTTGATT TACCTATTGC AAGGAGATCT  
TCACTTTATA GTTTTCTTGA GAAGAGAAAA GACAGGGACA CGGCTAGAGC GCCATACCAA  
ATGCATAATC CATTGCAATC ATCTTCAAGG ACTCGTGGAG ATCATTTTGA TCTCAATTTCT  
TAG

>SlJAZ5\_Solyc03g118540.2

```
ATGGAGAGAG ATTCATGGG GTTGACTGTG AAGCAAGAAG TTCTTGAAGA ACCTATAGAT
CCAGCACCTT TAAGAAGTTC AGCAATGCAG TGGTCATTCA CGAACAACGT CACTGCTCAT
CCTCAATACC TTTCTTTCAA GAGTGCTCCA GAGGATAAAC CGAAAATTGG TTTTGATTCT
CTTGACATCAA CTGGATTGGT GACTATAACC ACAACTGAAG CTGTTGACTC GAGTCATCGG
ACATACTCTG ATGTCACACA GAATCTGATA ACTACTGTAA ATCAACTCCC TGGTGCTGGA
GCTCTGGTTG TTAGCCCCAT TTCAGCTGTT CCGTCTAGCA GCATTGTCGT GGGCACCCT
GATTTAAGGG GTGCTCCCAA AACTCCCCCA GGTCTGCCC AGTTGACCAT CTTTTATGGT
GGTTCGTGCT GTGTGTATGA CAATGTTTCA CCGGAAAAGG CTCAAGCTAT TATGTTACTT
GCTGGAAATG CACCACCTGT TACACCAAAT GCAACATCTA CTCTATCTCC AGTTCAGGCA
CCTATACCTA AGTCTCGGC CATAGACTCT TTTGTTGTAA ATCAGTGCCG TAATACAACA
CCTACACTTG CCAGCCCCTT TTCTATAACA TCCCATGGTG GCGCGCAAGC TGCCAGAGTG
TCTACTACTA CAAATGGAGT AACTATTATC AAATCAATAG GAGTTCCTCC ATCTCCTTCT
CTTAAAGCCG AGCCTTCCAA AGTTACCAGT TCTGTAGGAT CTTTTCTGTC CTCCCTCGTT
CCATCAGCTG TGCTCAGGC GCGCAAGGCA TCATTGGCTC GATTCTTGA GAAGCGCAAG
GAAAGGGTAA TAAGTGCATC ACCTTATCCT CTCAACAGCA AGCAATCCCC AGAATGTAGC
ACTCCTGAAC TTGGAAGTAG AAGCCTCTCT ATGAATTCTT CAGGCTCTTG TCCTCCCCAC
ATAATCAGTT TGGTCAAGTA G
```

>SlJAZ6\_Solyc01g005440.2

```
ATGGAGAGGG ACTTTATGGG ATTGAATATC AAAGATTCTT TACTTGTAGT CAAGGATGAA
CCTGTTGAAA GCTCAAAAAG CTCTGGGTTT CGCTGGCCAA TGTCGAGCAA GGTGGTGTGA
CCTCATTTC A TGTCCTTGA CTCTGCTCAA GATGAGAACA CCTTCAAAGC TCTATCTGCC
ACAGATGGAG TCGATGCTGG TCTCAAACGT CAGCCTGGTG AACTCCAGAT GAAGCAAGTT
CTTGGTGGAA TTCCTGTTAC AGCTCCTCAT TCAATGCTTC CATCGCGTGG CTCTGTGGCT
GGAACAACCG AACCTTGGTT TAATTCCAAG GGTTCCTGCAG CACCTGCTCA ACTGACCATC
TTCTATGGTG GGATGGTCAA TGTCTTCGAG GATATCTCCC CTGAGAAGGC ACAGGCTATT
CATTGTTTTG CTGGACATGG CTGTGCTCCA CCTAATGTGG TGCAGCCAAG GTTTCACCTT
CAGGCATCTG CATCGAAACG TGCTGCTGCA GATGGTGTTC GTGTGAACCA AACCCCAAAC
ATGCTGCCTG CCTCGGTCTT TTCTAGCCCT ATGTCCGTTT CTTCCCATCC CATTGGTCAA
TCTGATGGCA GTTCTGGAAA CAAAGATGAC ATGAAGATGT CTA AAACTGC AAACATTTCA
GTGACTCCCC ATGTCAAAAT GGACACTTCA AAGATTGTGA CATCACTAGG ACCTGTTGGG
GCGACTACCA TAATGACAGC AGGTATGGCG TCGGTTCCAC AAGCTAGGAA AGCATCTTTG
GCTCGTTTTT TGGAGAAGCG CAAGGAAAGG GTGATGAACT TAGCACCATA TGGCCTCAGC
AAGAAATCGC CTGAGTGTCT CACCCCGAG TCTAATGGAG TTGGTTTTCT TGCAACTTCC
ACTCCTCTGT TAGCCGGTAA GGAGACCTAG
```

>SlJAZ7\_Solyc11g011030.1

```
ATGGATTCAA GAATGGAGAT AGATTTTATG GACCTCAACA GCAAACCAA ATTATCAGAA
ATGGAGAAGC AACACAAAA AGTATCTGGA ATGAAGTGGC CATTTTCATT GGCTGATTTA
GCTACTCACC ATGAACACAC ATTTTTTCAG AATTACAAAT CCACCCCAAT AGTTTCCATT
AATTCAAAAA ATTCATCCCT AAACAATTAC AAATCCACCA TTGACCCCA ATACTTTAGA
GGGACTTTTC CTCTATTAGC AAAAAACAAGC ACTTATGACT CAAGGAAAAA TTATGACAAT
TTGAGTCCAA ATGAGTCAAC ATTGACCATA TTCTACATGG GTGAGGTCCA TATTTTTCCG
GGTATATCAC CAGAAAAGGC TGAGCTTATA ATTGACCTGG TTTCTAAATC AACAACTCTC
CACATGGATG AGATTTTAGA AAAAGTGATG AATAAAGAAA AATATGAAGA AAATAAATCA
GACCCTTCAA ATGCATCCAC AAATTATGCT AAAGGAGCAC TTGCTATGGC TCGTAGAGCA
ACTCTTGAC GATTTTTGGA GAAGAGAAAA CATAGATTGA TCAAAGCTAG GCCGTATCTA
TATGGGGAAA ATTTATCAAA GTTTCCCTTT GATATTCAAC AACAAGAAGA AGAAACGGCG
TCGTCAAGCG TTCATTGGGA AAATAA
```

>SlJAZ8\_Solyc06g068930.1

```
ATGCATTGGT CATATCTAA CAAGGCTCAT CCTCAATACC ACCTTTCCTT GAAGACCAA
GAGAATATTA TTATTAATAA TAATAATAAT AATAAGCCTA AGATTGGTTT CGAATCTCTT
GCATCAGCTG GATTAGTGAC GATAACCACA ACTACTGAAC TATTTGACAC AATTCATAGA
CCATATACTA CTCAATTTGG TGCACATCAT GTCCCAACAC GCAATGGTGT TGTGGGCACC
```

ACTGAATTGA GGGGTACACC TAGACCATCA CCAGGACCTG CTCAATTGAC CATGTTTTTAC  
GCTGGTTCTG TCTGTGTTTA CGATAATATT TCACCAGAGA AGGCTCAAGC TATTATGTTA  
CTTGCTGGAA ATACACCAAT TAGTACAACA ATTCGAAATT CTCCTTCTCT TGATCATCAT  
CATCATCATC ATCATAATAA TAATAATAAT AATAATAATA ATAGTACAAA TGAAACAACA  
ATTATCAGAT CAATCGGAGT CCTAAAATCC CATGAGCTAT CGAAAATTGT TACTTCTCAA  
GAATCTCGTC AACCTCCCAA TCATAACTTA TCAGCTGTTT CTCAGGCTCG CAAGGCATCC  
TTGGCTAGGT TCTTGAGAG ACGCAAGGAA AGGGTAGTGA GTGCATCACC ATATGGAAAT  
GGCAAGCAAA GCTCACAAACA TATGATGAAC TTTACAATAA ATTCCTCAGG CTCAAGTACT  
TCACTTCCTG CTGCAAATTA G

>SlJAZ9\_Solyc08g036640.2

ATGAGAAGAA ATTGTAATTT GGAGCTCACT CTTATGCCTC CTTCTATTTT AGATAACTTT  
TCTTCTAAGA ATTGCACTAC GGAGGATCAA CAATTGGAGA ATAAGCAATC GCAACAGCTA  
ACCATATTTT ACCATGGAAA ATTTGTGGTT TCCGATGCTA CTGAGCTTCA GGCTAAAGCT  
ATAATATATC TTGCAAGTAG AGGAATGGAG ATGAAAACAA ACAAGATGTC TGAGCCTTCA  
TCACCATTAT TACAACCTCA AACTGTGAAG AAATCTCTAC AAGGATTTCT AAAAAACGA  
AAAAAAGAG TTCAAGCAAC TTCGCCATAT CACAAATAG

>SlJAZ10\_Solyc08g036620.2

ATGAGAAGAA AGTGTAATTT GGAACCTCACT CTTTCTCCTA GCAACTTGTT GATGGAGGAT  
AAAAGATTAG AGAATGAGCA ATCACAACAG CTAACTATAT TTTACAATGG AAAATTTGTT  
GCTTCTCATG TTACTCAGCT TCAGGCTAAA GCTATAATTT ATCTTGCGAG TAGAGAAATG  
GAGGAGAAAA CAAATAAGCT GTCTGAGCCT TCATCACCAT TATTACAACC TCAAAGTGTG  
AAGAAATCTT TACAGAGATT TCTACAAAAA AGAAAAAATA GAATTCAAAT AACTTCTCCA  
TATCATCACT AG

>SlJAZ11\_Solyc08g036660.2

ATGAGAAGAA ATTGTAATTT GGAGTTTAGG CTTATGCCAC CTTCTCTTTC TACTTTTTTCT  
CCTAACATTT GCAGTAATAA TAATACATCC TCCTATTTTT CAATGGAGGA GGATAAAGAA  
AGCACAGAAT TAGAGCAGAA ATCTGAGCCG TTAACCATAT TTTACAATGG AAAACTTGTG  
GTTTCTCATG TTACTGACCT TCAGGCTAAA GCTATAATAT ATCTTGCAAG TAGAGAAACA  
GAGGAGAAAA CAAACAAGAG TCTGTACCA ATATCTGAGC CATCATCACC ATTATTACAA  
CCTCAAAGT TGAAGAAATC TCTACAAAAG TTTCTACAAA AAAGAAAAAG TAGAACTCAA  
ACAACTTCGC CATATCATCA CTAG

>SlJAZ12\_Solyc01g009740.1

ATGTCTTCAG GACTGATAA TGTGATTGGA AATACCCATC CCTATGAAAT TCTGAAGAAT  
GAAACAACAA ATATTGTGAC TCTGAGTTTT ATCTGCGATG AAATAGTTGA GATTTTTAAT  
GTCTCAAGGG ATAAGGCTGA GGAAATTCTA AAGTTTGCTG ATATGTCAA AGTTGTGAAT  
GACTGTTTCA CAAAAAACC ATTTGGTTTG GAAACACAAA GTCAAGGTAA AGGTAAGGAG  
AACTCTCAA CAGCGAGGAG AAATCTCAA CTTAGATTCT TGGAGAAGCG AAAAGAGAGG  
ATTTGTGATG TCTTGAAAA TGGCATGAAA ATCTGTCTTA TGACTATTGC GTGCAATGGA  
AAGGTTGCAA ATTTCAATGT CTCCAGTGAA AAGGCGAAGG ATATCCTAAT ATTTGCAGAA  
TTGTTAAAAG TTACGGATGT CATTCCACCA ACAAAAAGCC AATCAAATGT GGAAACATTC  
AGTGGAGGTA GATTTTGGGA GAAGCAATAT CCGAGGCTTA ACTCTTGCTT GAAAAATGGC  
ATAATAATTG CGCCTTTGAC TATTTGCTAT GATGGAACGA GTGTGAGTTT CAATATCTTC  
AGTGATAAGG TGGCAAATAT TCTAGAGTTT GCAGAAAAGT TAAAATTTAG AGATGCAGTT  
TCATCTGAAA AACAATPAT CGTGGAACA TTAAGTGGAG CTCAACCTTT GCCTAGGAGA  
AACTCTATGC TTGGATTCTC GGAGAAGGGA AAAGAGAGGG TTTGTGGTGG CTCGAAAAAT  
GCCAAGGAAA TTCACTTTT GACTATTTGC TACAGTAAA TGGTTGCATC TTTTTATGTC  
ACTAGTGACA AGGCGCATGA TATTCTAAAA TTTGCTGAAA CATCAAGAGT TAGGAATGAC  
TTTTCTCCAA ACTTTGGAGA TTTATCATTG ACAAGGAGCA TCTCCTTGCC TAGATCTTGT  
GAGAAGCCAA AAACAAGGCT TGACTACATT GCAGTAAATA TTTTCTTCTA CGAAGGAAAC  
ACCACTACTC TCAATGTCT TATTGATAAG ATGCTAAATA TTCTAGCGTT CGTAGAAAGG  
TCAAATTTTG GTGATGCATG TCCATCTGGA AAAAAATTCC CCGCGGAAAT ATTAAGTGGGA  
GATCAGCATT TGGCTAGGAG AAATCTGTG CTTGGATTCT CAGAGAAGCA AAAAGATAGG  
CTTTGTGATG GCTCGAAAAA TGGCTTGAGA ACTGCACCTT TAATATTTG CTACTGGGGG

ATGGTTGGAA AATTCAATGT CTCCAATGAT GAGGCGAATG AAATTCATAA GTTTGCAAAA  
AGGTCAATAA CTAATGATGT ATTTTCATCA AATAGTGGAG ATCTATCATT GCCGAAGATA  
AACTCTTCGC TTAGATTCTC CGAGAAGCCA CAAATAAGGC TTGGTTGTGA GTCGGAAAAAT  
GGCGTTAAAG TTGAACCTTT GACTATTTTT TATGATGGGA AGATTGTGGT TTATGATGTA  
TCCATTGAGA AGGCAACAAA TATTCTTAAG TTTGTAGAAA GAGATGCAAT TTCATCTAAA  
AAGGAATTTT CCATGGAATC ATTAAGCGGA GATCTTCATT TGGCTAAGAG AAACTTTATG  
CATGGAGTTT TGGAGAATCG AAATGAGAGG TTTTGTCTC CGGGATTCTG AGACATAAAA  
ATTGCGCCTC TGAGTATCAT CTACAATGGA AAACCTGCGA TTTTCGATGT CCGGAGTTAC  
AAGGTGGATG AAATTCATAA GTTCGCAGAA TCGTCAAAAC AACAAACCTT AAGCCAAGAT  
GTATTGACAA CGAGAAAAATC CTCAGTTAGA TTCTTGAGAG AGCGACAAGA GAGGATGACT  
ATGGTGTAC CTTATGGTTT TCCCCATGCT GCCCCTGAAA ATAAGAAATA G

>SlNINJA\_Solyc05g018320.2

ATGGACGAAA ATGATCTTGA TCTAAGCTTG GGCCTGCCCT GTGGTGGGGT GGTTCGCTCA  
GAGAAAAGTA AAAGTGGGAG CTCATCGGAT TCCAAGGTTG AGGAAGTTGA TAGAGATGGA  
AAAGTGATTA ATGATTTCAA GAACTTTCTG GATGGAGGCA CTAGCAGCCA AAAGCATGAT  
TGTGTGTGTC GTTCTCAGAG AAGTGATTCA ACAAACATG GTGGGAACCT GCTTTCCAGC  
ACTAGTGTGC ATGCAGATGC TTCTAAAAAG TTAAATAGTG GAGGATTCGT GGTTCCAAAT  
GATAATAGAC CTATAGAAGT TGAAGAAGAA AGGAGAAGT AAGTGGGTGA AAAGCGTAAA  
AATTTGTTCC GGGAGTCAAG TCAACAAAAG AAGCATGAGA GAGAAGCTCA TCATGTCGAT  
ATGCATGACA AGACAAGGGC ATCACACATT TCAATAACAA CAGATGATGG TTCGACTGCA  
GAAAATGATG ATGTAGCTGA TTCTGAAACT GTGGGTTCAA CTTCCAGGCA AATTTTGCAG  
CATGATGAGA ACTCTAAAAG ATTTGTTGGA AGTAGTGCTG AGGTTTATAA GGAGCTTCGT  
GGTGTTCCTG ATTCAAGTGG TGTAGAATTA CTTGGACAGA GAAGGTTTAC CATTTCTTCT  
GAAAAGGATG TTAAGTTCGG TAATACGCCA TACAGTACCC CATTCCAAGG CCAATCAATA  
AACATCATGA ACCTACCATA CTCTATGCCT CTGAGAGATT CTAACCCTGG TAATACAGCA  
AGTACGACTG GTTATGCAGT TCCTGGCATG ATGCAAGTAA TAGCTACCAC TAGTGGAGAT  
AGACCTGGAG CCCAGCCTGT CATACTACT AATTTGCCAT TGATGTTTGG CTACTCTTCC  
ATACAGTGC CAACATTGGA GAAGGATAAT TCCCAGGCTG CAGCTTCTCA TCTTCAGCAG  
CTTACCCTT CCTATGGACG AGGTTCTTTG GGCTCAGACA AGCATAAAGA TGGACCAAAT  
ATTTCTCAAG CTACGTTGCC GATTATTGCA CACAAGTCTT CTGAATCTGT ACAATATGAT  
GGGAGGGCAG TGGAGCATGT GAAAGGCAAT GGGAGACAGC ATAACGCGGA AGAACTTCC  
ACTTCTCGAG TGGAAAGAAA TGTTAAAGGT AGCAACATAA GCTTCAGGTC AAAAGACCCT  
CCTGAGCAGC CGAGAGCTGA AGCAGTTCTT TCAGAATTTG CAACTATAAG GCCAGGCTT  
GCTGCAGATC TGAAATTTGG AGGATCTGGT TCCTATCCGA ATCTACCATG GGTTCACA  
ACTGGTCCAG GTCCAAATGG TAGAACAATA TCTGGTGTTA CTTATAGATA CAATCCCACC  
CAAATCAGGA TTGTTTGTGC TTGTATGAGG TCTCACATGT CACCGGAAGA GTTTGTGCGG  
CATGCTAGCG AAGAGCAAAC TAGTCAAGAA GGTGGTGCTG GTGTTTCATC GTTTCCAAGT  
AGCAATCCTG CTGCCTCTGC ACAAAGCTGA
