# Supplementary material for: Jasmonate ZIM-Domain (JAZ) Protein Regulates Host and Nonhost Pathogen-Induced Cell Death in Tomato and Nicotiana benthamiana
Source: PLoS One. 2013 Sep 27;8(9):e75728. doi: 10.1371/journal.pone.0075728 (PMC3785428; doi:10.1371/journal.pone.0075728)
Supplement: Table S1 — List of primers used in this study. (XLSX) [file pone.0075728.s005.xlsx]

## Sheet: Sheet1
Supplemantary Table S1. List of primers used in this study
Primer sets for qRT-PCR
Gene locus	Sequence Definition	FW primer	RV primer
Solyc07g042170	SlJAZ1	TTCCCTCAAGGTGGAATGAAGGCT	TCCGAAACTCGGAACCACCAAATC
Solyc12g009220	SlJAZ2	ACCTGATCAACCAGAGAAGGCACA	ACCTGATCAACCAGAGAAGGCACA
Solyc03g122190	SlJAZ3	TTCCCTGCTGACAAAGCTAGAGCA	AGGGTGCAGATGAAACTGATCCGA
Solyc12g049400	SlJAZ4	GCCAAAGCCTCAGCAACAAAGGAT	ATCACTGCTCTGGCTTTCTCTGCT
Solyc03g118540	SlJAZ5	TCAGCTGTTCCGTCTAGCAGCATT	TGCATTTGGTGTAACAGGTGGTGC
Solyc01g005440	SlJAZ6	AGTCGATGCTGGTCTCAAACGTCA	TCGAAGACATTGACCATCCCACCA
Solyc11g011030	SlJAZ7	TTGCTATGGCTCGTAGAGCAACTC	TTTCCCAATGAACGCTTGACGACG
Solyc06g068930	SlJAZ8	TCGTCAACCTCCCAATCATAAC	GGAAAGGGTAGTGAGTGCATC
Solyc08g036640	SlJAZ9	TTTGGAGCTCACTCTTATGCCTCC	AGCTCAGTAGCATCGGAAACCACA
Solyc08g036620	SlJAZ10	GGAACTCACTCTTTCTCCTAGCAAC	TGGTGATGAAGGCTCAGACAGCTT
Solyc08g036660	SlJAZ11	GGAGTTTAGGCTTATGCCACCTTC	GGCTCAGATATTGGTGACAGACTC
Solyc01g009740	SlJAZ12	TGCGCATTCCGAGGCATGATGATA	CCTTCTTGCAATTGGCAACTCTGCT
Solyc08g006890	SlTublin	GGTGATGATGAAGCAGATGG	AAACAGACCGGCATTTTACAG
Primer sets for yeast two-hybrid
Gene locus	Sequence Definition	FW primer	RV primer
Solyc05g052620	SlCOI1	CATGGAGGCCGAATTCATGGAGGAACGGAACTCAACGAGA	GCAGGTCGACGGATCCCTATTCAGCGAGAAGGTAAGTTGG
Solyc05g018320	SlNINJA	GGAGGCCAGTGAATTCATGGACGAAAATGATCTTGATCTAA	CGAGCTCGATGGATCCTCAGCTTTGTGCAGAGGCAGCAGGA
Solyc07g042170	SlJAZ1	GGAGGCCAGTGAATTATGGCTTCATCGGAGATTGTG	CGAGCTCGATGGATCCTAGTATTGCTCAGTTTTCAC
Solyc12g009220	SlJAZ2	GGAGGCCAGTGAATTCATGGGGTCATCGGAAAATATGGAT	CGAGCTCGATGGATCCCTAGAAATATTGCTCAGTTTTAAC
Solyc03g122190	SlJAZ3	GGAGGCCAGTGAATTATGTCGAATTTATGTGACGCTCGC	CGAGCTCGATGGATCTCAAAAAAGATGGTAACAACGGAT
Solyc12g049400	SlJAZ4	GGAGGCCAGTGAATTCATGTCAAATAGGCAACTTTGTT	CGAGCTCGATGGATCCCTAGAAATTGAGATCAAAATGA
Solyc03g118540	SlJAZ5	GGAGGCCAGTGAATTCATGGAGAGAGATTTCATGGGGTTGA	CGAGCTCGATGGATCCTTATTTTGCCGCCTTTGGCAATGCA
Solyc01g005440	SlJAZ6	GGAGGCCAGTGAATTATGGAGAGGGACTTTATGGGATTG	CGAGCTCGATGGATCCCTAGGTCTCCTTACCGGCTAACAG
Solyc11g011030	SlJAZ7	GGAGGCCAGTGAATTATGGATTCAAGAATGGAGATAGAT	CGAGCTCGATGGATCCTTAGTTTTCCCAATGAACGCTTGA
Solyc06g068930	SlJAZ8	CATGGAGGCCGAATTCATGCATTGGTCATATTCTAACAAG	GCAGGTCGACGGATCCCTAATTTGCAGCAGGAAGTGAAGT
Solyc08g036640	SlJAZ9	GGAGGCCAGTGAATTCATGAGAAGAAATTGTAATTTGG	CGAGCTCGATGGATCCCTATTTGTGATATGGCGAAGTT
Solyc08g036620	SlJAZ10	GGAGGCCAGTGAATTCATGAGAAGAAAGTGTAATTTG	CGAGCTCGATGGATCCCTAGTGATGATATGGAGAAGT
Solyc08g036660	SlJAZ11	GGAGGCCAGTGAATTCATGAGAAGAAATTGTAATTTGG	CGAGCTCGATGGATCCCTAGTGATGATATGGCGAAGTT
Solyc01g009740	SlJAZ12	GGAGGCCAGTGAATTCATGTCTTCAGGTACTGATAATG	CGAGCTCGATGGATCCCTATTTCTTATTTTCAGGGGCA
Primer sets for VIGS
Gene locus	Sequence Definition	FW primer	RV primer
Solyc12g009220	SlJAZ2	GCCACAGCCTTCTGTTGCTGATTT	TTCCACAGCTCGAACCTGTTACCT
Solyc01g005440	SlJAZ6	AGTCGATGCTGGTCTCAAACGTCA	ATGGGAAGAAACGGACATAGGGCT
Solyc11g011030	SlJAZ7	CCATATTCTACATGGGTGAGGTCC	TTTCCCAATGAACGCTTGACGACG
